# Supplementary material
Source: publisher site journal article supplement (https://www.dovepress.com/get_supplementary_file.php?f=509323.docx)
Supplement: Supplementary file 1 [file get_supplementary_file.php]

**Appendices (1): Knowledge and attitude of medical research questionnaire**

Are you registered in Sail Research School?  *

Yes

No

Name: *

Gender: *

Male

Female

Academic Year*

Year 2

Year 3

Year 4

Year 5

Year 6

Internship

Have you participated in research before? *

Yes

No

If yes, how many times? *

1

2

3

4

5

More than 5 times

Did you join any research courses before? *

Yes

No

Why do you want to do research?  (you can choose multiple answers) *

To Improve my scientific knowledge

To improve my curriculum vitae (CV)

Curiosity

Peer pressure (competitive)

Interested in a research career

Other:

How confident you’re about conducting research? *

Completely confident

Slightly Confident

Somewhat confident

Fairly confident

Not confident at all

What are the obstacles that face you when you try to do research? (you can choose multiple answers) *

Lack of time

Lack of research training

Lack of statistical support

Lack of mentorship

Lack of financial incentives

Lack of research team

Lack of university support

Lack of access to healthcare centres and hospitals

Lack of local or national studies

Lack of incentive to do research

Other:

PICO Abbreviated for? *

Population, intervention, comparison, outcome

People, interesting, centered, objective

Primary, intermediate, comorbidity, outstanding

I don’t know

What does critical appraisal mean? *

Application of rules of evidence to a study to assess the validity of the data, completeness of reporting, methods, and procedures

an overview of the previously published works on a topic

Writing an overview of previous research papers

I don’t know

A review of the literature before formulating research questions allows the researcher to do which of the following? *

To become familiar with prior research on the phenomenon of interest.

To identify potential methodological problems in the research area.

To develop a list of pertinent problems relative to the phenomenon of interest.

All of the above

I don’t know

The Introduction section of the research proposal? *

Gives an overview of prior relevant studies.

Contains a statement of the purpose of the study.

Concludes with a statement of the research questions and, for quantitative research, it includes the research hypothesis.

All the above

I don’t know

Which citation style is famously used in science and medicinal research? *

The Vancouver Referencing Style

APA Style

MLA Style

Chicago Manual Style

I don’t know

A study was conducted to determine if there is a difference between smokers and nonsmokers in systolic blood pressure (in mmHg). A total of 100 persons were asked about their smoking status and their blood pressure was measured. What statistical test of significance is most appropriate? *

T-test

ANOVA

Chi-square

Correlation

I don’t know

A cohort of 150 diabetic patients is randomly assigned into three groups of three different treatments, to compare the mean blood glucose level in studied groups after one month of treatment, you will use? *

Chi-square test

Paired t-test

Analysis of variance (ANOVA)

Correlation

I don’t know

The Method section of the research plan typically specifies? *

The research participants

The apparatus, instruments, and materials for the research study

The planned research procedures

All the above

I don’t know

Which one of the following are the best criteria for assessing an appropriate sample size? *

P-value, Power, and Effect

Study and Target Population

Large sample size and large p-value Level of

P-value

I don’t know

Which one of the following variables is ordinal? *

School level

Region of the kingdom

Systolic blood pressure

All of the above

I don’t know

In a given population prevalence of disease can be rapidly determined by? *

case-control study

cohort study

cross-sectional study

cross over study

I don’t know

Simple random sample is one in which: *

From a random starting point, every unit from the sampling frame is selected

A non-probability strategy is used, making the results difficult to generalize

The researcher has a certain quota of respondents to fill for various social groups

Every unit of the population has an equal chance of being selected

I don’t know

Chronbach alpha test is used for? *

validation

reliability

all of the above

I don’t know

Which one of the measures of central tendency could be affected by the extreme values? *

Mood

Median

Mean

Confidence interval

I don’t know

What type of study design involves observing a group of individuals over an extended period to identify associations or causality? *

Cross-sectional study

Cohort study

Case-control study

Randomized controlled trial (RCT)

I don’t know

What are the core elements of a Research Process? *

Introduction; Data Collection; Data Analysis; Conclusions and Recommendations

Executive Summary; Literature Review; Data Gathered; Conclusions; Bibliography

Research Plan; Research Data; Analysis; References

Introduction; Literature Review; Research Methodology; Results; Discussions and Conclusions

I don’t know

After the data has been processed and analyzed, the Interpretation of data will be written in which of the following sections? *

Result

Discussion

Conclusion

Abstract

I don’t know

Which of the following is not a component of the abstract section? *

introduction

methodology

results

Discussion

I don’t know

Which section of a research paper provides a concise summary of the entire study? *

Abstract

Results

Conclusion

Literature Review

I don’t know

What is the primary purpose of the "Conclusion" section in a research paper? *

Present new research questions

Summarize key findings and their implications

Describe the study's methodology

List additional references

I don’t know

Where is the literature review usually found in a research paper? *

Abstract

Introduction

Methodology

References

I don’t know

The "Methods" section of a research paper should include details about: *

Previous research

Ethical considerations

Study results

Hypotheses

I don’t know

In which section do researchers discuss the limitations of their study? *

Abstract

Introduction

Methodology

Discussion

I don’t know

Where do you typically find citations and sources in a research paper? *

Abstract

Introduction

References

Conclusion

I don’t know

Plagiarism? *

Making up data or results and recording or reporting them

Changing the research record so that it doesn’t accurately reflect the research findings

Using another person’s ideas, processes, results, or words without giving credit

I don’t know

A researcher wants to conduct a study to assess the knowledge of hypertension management among primary healthcare physicians. He will use a validated questionnaire to assess the knowledge. When should he distribute the questionnaire? *

Before IRB submission

After IRB submission

After getting IRB from the IRB committee

I don’t know

Informed consent is? *

the process by which a person voluntarily agrees to participate in a research study after being fully informed about the study

the legal document that explains the study

A document stating that the study information was presented orally to the person

all of the following

I don’t know

**The attitude of medical**

| Statement | Strongly agree | Agree | Natural | Disagree | Strongly disagree |
| --- | --- | --- | --- | --- | --- |
| I will participate in doing research in future. |  |  |  |  |  |
| All medical students should be trained to do research. |  |  |  |  |  |
| Research education should be mandatory in medical students' curriculum. |  |  |  |  |  |
| Conducting and utilizing research is important skills for physicians. |  |  |  |  |  |
| Research will help in better understanding of the subject. |  |  |  |  |  |
| Research will help in one's clinical practice later. |  |  |  |  |  |
| Research is helpful to enhance one's critical thinking. |  |  |  |  |  |
| Carrying out Research work is stressful. |  |  |  |  |  |
| Research work should be made optional. |  |  |  |  |  |
| Research hours are enjoyable. |  |  |  |  |  |
| A medical student should be able to plan and conduct a research project and write a scientific publication. |  |  |  |  |  |
| Research could be a factor in increasing hate between classmates. |  |  |  |  |  |
